# Supplementary material for: Quantitative trait loci and differential gene expression analyses reveal the genetic basis for negatively associated β-carotene and starch content in hexaploid sweetpotato [Ipomoea batatas (L.) Lam.]
Source: PubMed Central journal article supplement (PMC6952332; doi:10.1007/s00122-019-03437-7), 2019-10-08

# Linkage Group

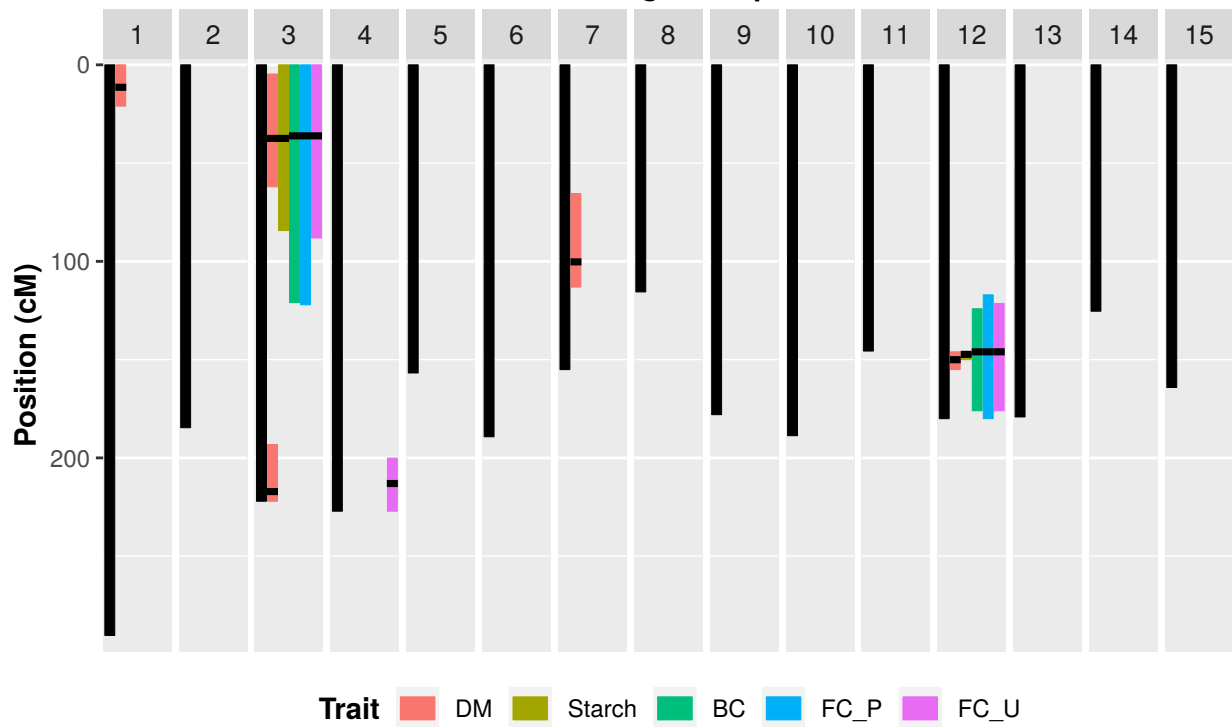

Supplement: 122_2019_3437_MOESM5_ESM.pdf [file 122_2019_3437_MOESM5_ESM.pdf]
